## Addendum: Genetic modifiers of p53: opportunities for breast cancer therapies

**Prabin Dhangada Majhi<sup>1</sup>, Aman Sharma<sup>1</sup> and D. Joseph Jerry<sup>1,2</sup>**

<sup>1</sup>Department of Veterinary and Animal Sciences, University of Massachusetts, Amherst, MA 01003, USA

<sup>2</sup>Pioneer Valley Life Sciences Institute and Rays of Hope Center for Breast Cancer Research, Springfield, MA 01107, USA

**Published:**

**Copyright:** © 2024 Majhi et al. This is an open access article distributed under the terms of the [Creative Commons Attribution License](#) (CC BY 4.0), which permits unrestricted use, distribution, and reproduction in any medium, provided the original author and source are credited.

**This article has an addendum:** This article received a publication fee waiver.

Original article: Oncotarget. 2023; 14:236–241. <https://doi.org/10.18632/oncotarget.28387>
